# Supplementary material for: Effects of applied surface-tension on membrane-assisted Aβ aggregation
Source: Royal Society of Chemistry journal article supplement (doi:10.1039/d1cp02642a), 2021-01-01
Supplement: d1cp02642a1.pdf [file d1cp02642a1.pdf]

# Effects of Applied Surface-tension on Membrane-assisted $A\beta$ Aggregation

Abhilash Sahoo<sup>†</sup> and Silvina Matysiak<sup>\*,†,‡</sup>

<sup>†</sup>*Biophysics Program, Institute of Physical Science and Technology, University of  
Maryland, College Park, MD*

<sup>‡</sup>*Fischell Department of Bioengineering, University of Maryland, College Park, MD*

E-mail: matysiak@umd.edu

## Protein model

The coarse grained peptide model consists of three primary bead types — charged (sidechains of LYS and GLU), polar (peptide backbone) and hydrophobic (others). The polar bead-types have explicit dummy-charges added to them to represent molecular polarization. These dummies can lead to induced-dipole effects and therefore introduce directionality to interactions. The impact of these dummy-charges in protein structural transitions has been explored in previous publications.<sup>1</sup> The cross-interactions between these bead-types have been defined from free-energies of solvation and partitioning (hexadecane-water). Further details about forcefield parameters, details of parametrization and model validation are provided in Ganesan *et al.*,<sup>2</sup> with minor modifications listed in Sahoo *et al.*<sup>3</sup> Previous publications have used this model to study membrane/surface-assisted peptide folding and role of headgroup charge on membrane-assisted  $A\beta$  aggregation.<sup>2,3</sup>

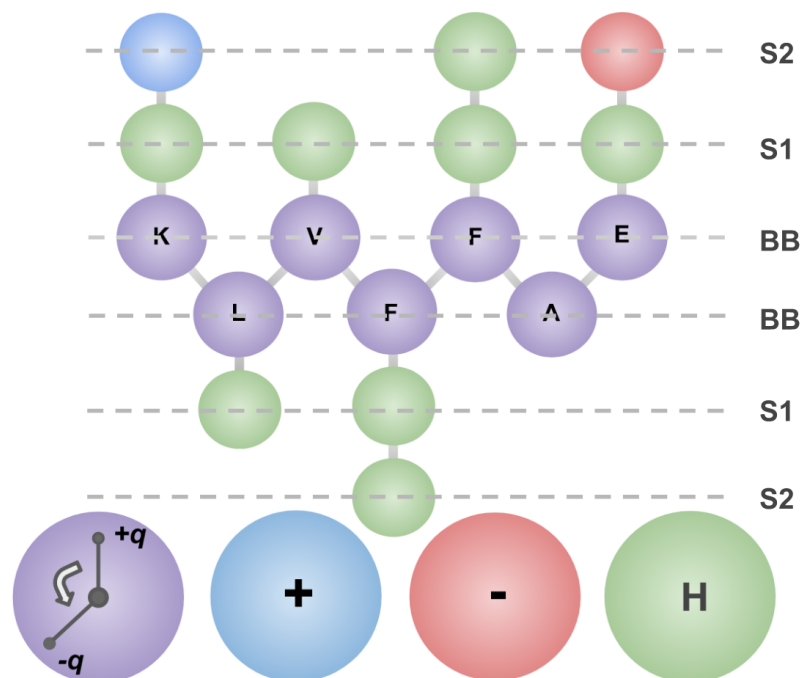

Figure S1: A schematic description of peptide coarse-grained model. Colors: green- hydrophobic bead; violet, polarizable beads ; red, negatively charged bead; blue, positively charged bead. Image reproduced from Ganesan *et.al.*<sup>3</sup> with permission from the PCCP Owner Societies.

## Membrane model

The lipid model follows a 4:1 form of coarse-grained mapping scheme, with a single POPC molecule represented by 13 CG-beads. The Phosphate (PO4) and Choline (NC3) are charged CG-beads mapping to the headgroup atoms, and the glycerol-esters are represented with polarizable beads, similar to the ones introduced in the peptide model. The lipid tails are mapped as strings of hydrophobic beads. The membrane model can reproduce accurate electrostatic — dipole moment and headgroup bridging; and structural features — line tension and membrane compressibility.<sup>4</sup>

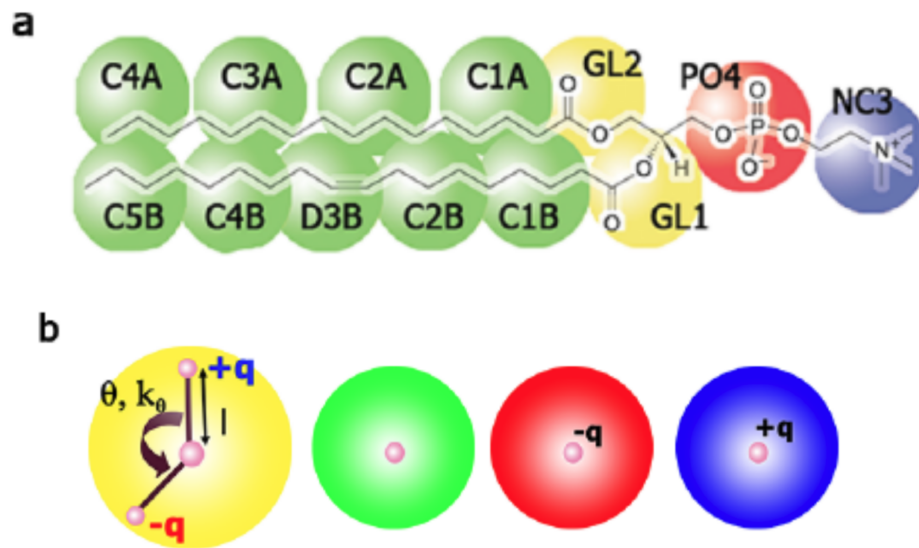

Figure S2: (a) Mapping scheme for POPC coarse-grained lipids; colors: green, hydrophobic bead; yellow, polarizable beads ; red, negatively charged bead; blue, positively charged bead. Image adapted and modified from Ganesan *et.al.*<sup>4</sup> with permission from the PCCP Owner Societies.

## Simulation Protocol

All the simulation-systems studied in this article have followed exactly same simulation protocol and the simulations have been performed with Gromacs 4.5.7.<sup>5</sup> The initial membrane systems were created with lipid molecules and water molecules placed in a grid, with an adapted version of insane python script.<sup>6</sup> The membrane was energy minimized and equilibrated over 10 ns, with constant number, pressure and temperature (NPT) ensemble. Nose-Hoover thermostat was used to maintain temperature at 300K, with time constant 1 ps.<sup>7</sup> The Parinello-Rahman barostat with time constant 1 ps and compressibility  $3.5 \times 10^{-5}$ /bar was used with semiisotropic pressure coupling to maintain a pressure of 1 bar.<sup>8</sup> The long range electrostatics is determined through Particle-Mesh Ewald method with relative dielectric constant of 2.5 and cutoff distance at 1.6 nm.<sup>9</sup> The Lennard-Jones interactions were scaled down from 0.9 nm to 1.2 nm with the Gromacs shift scheme. This initial phase allowed the membrane to be equilibrated.

After that peptides were added to the aqueous phase randomly away from the membrane.

The system was again energy minimized, and then equilibrated for 50 ns with position restraints on the backbone bead of the central Phenylalanine. At this stage, different values of surface-tension was applied on different systems with the Berendsen barostat,<sup>10</sup> with other parameters and simulation conditions fixed. Finally, the position restraints were removed, and the peptides were allowed to interact among themselves and the membrane.



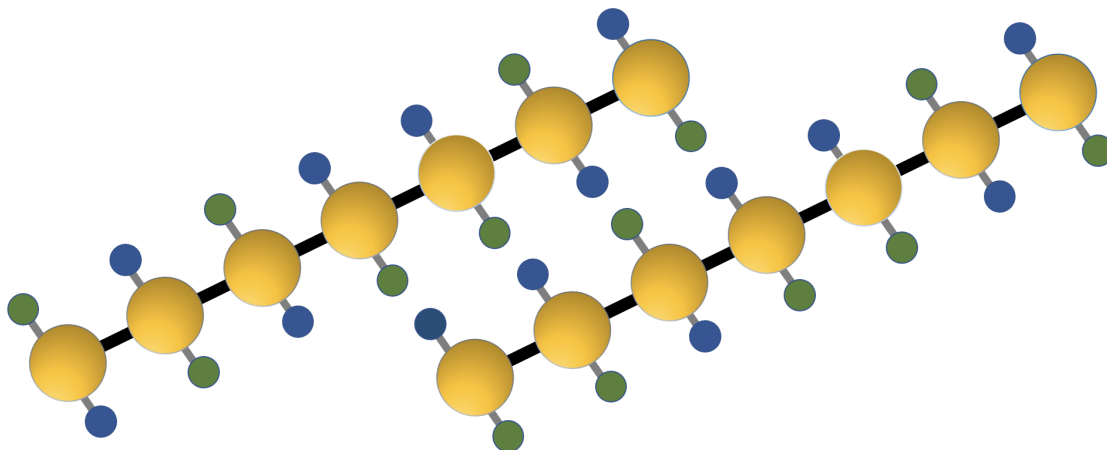

Figure S3: A schematic description of the metric used to determine ordered aggregation. The yellow spheres represent peptide backbones; and the green (positive) and blue (negative) spheres represent charged dummies. A peptide is classified as forming an ordered aggregate, if *at-least* 3 backbone dummies align with another peptide.

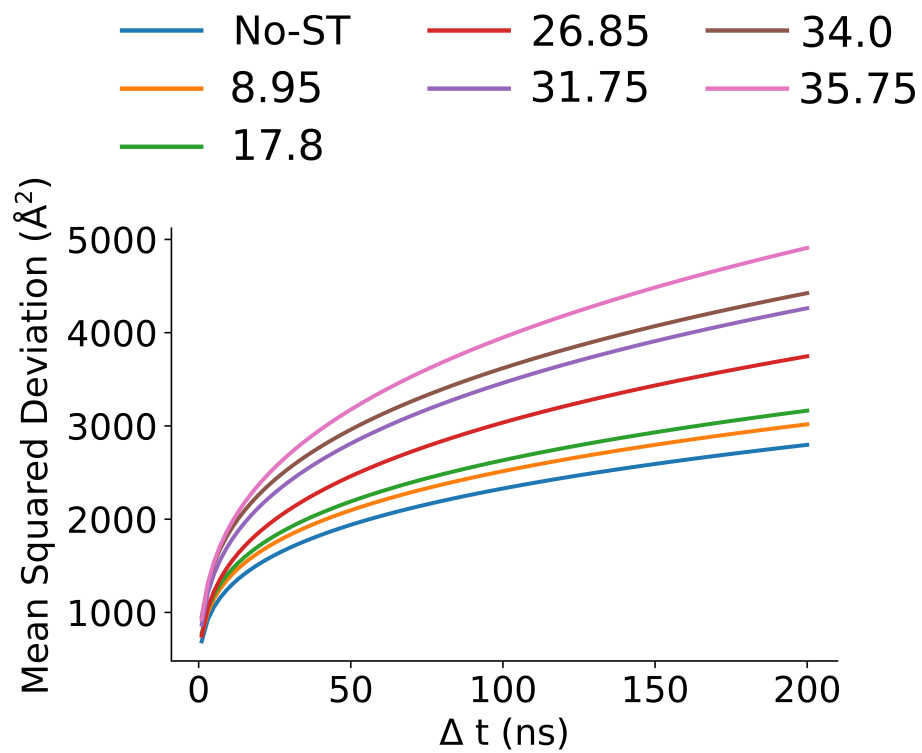

Figure S4: Mean squared deviation of a single peptide in presence of the membranes at different surface-tension.

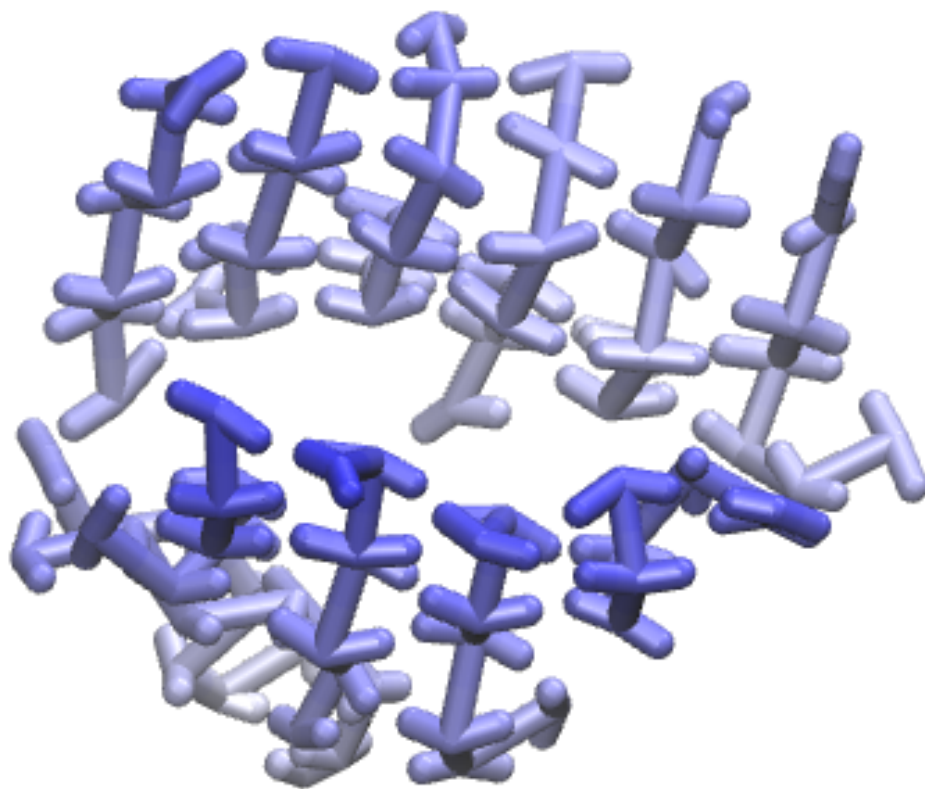

Figure S5: Molecular snapshot of peptide aggregate in aqueous solution. Colors: Peptide backbone and associated dummies in blue.

## References

- (1) Ganesan, S. J.; Matysiak, S. Role of Backbone Dipole Interactions in the Formation of Secondary and Supersecondary Structures of Proteins. *J. Chem. Theory Comput.* **2014**, *10*, 2569–2576.
- (2) Ganesan, S. J.; Xu, H.; Matysiak, S. Influence of Monovalent Cation Size on Nanodomain Formation in Anionic–Zwitterionic Mixed Bilayers. *J. Phys. Chem. B* **2017**, *121*, 787–799.
- (3) Sahoo, A.; Xu, H.; Matysiak, S. Pathways of amyloid-beta absorption and aggregation in a membranous environment. *Physical Chemistry Chemical Physics* **2019**, *21*, 8559–8568, Publisher: The Royal Society of Chemistry.
- (4) Ganesan, S. J.; Xu, H.; Matysiak, S. Effect of lipid head group interactions on membrane properties and membrane-induced cationic  $\beta$ -hairpin folding. *Phys. Chem. Chem. Phys.* **2016**, *18*, 17836–17850.
- (5) Abraham, M. J.; Murtola, T.; Schulz, R.; Páll, S.; Smith, J. C.; Hess, B.; Lindahl, E. GROMACS: High performance molecular simulations through multi-level parallelism from laptops to supercomputers. *SoftwareX* **2015**, *1-2*, 19–25.
- (6) Wassenaar, T. A.; Ingólfsson, H. I.; Böckmann, R. A.; Tieleman, D. P.; Marrink, S. J. Computational Lipidomics with insane: A Versatile Tool for Generating Custom Membranes for Molecular Simulations. *Journal of Chemical Theory and Computation* **2015**, *11*, 2144–2155.
- (7) Nosé, S. A molecular dynamics method for simulations in the canonical ensemble. *Mol. Phys.* **1984**, *52*, 255–268.
- (8) Parrinello, M.; Rahman, A. Polymorphic transitions in single crystals: A new molecular dynamics method. *J. Appl. Phys.* **1981**, *52*, 7182–7190.

- (9) Darden, T.; York, D.; Pedersen, L. Particle mesh Ewald: An NlogN method for Ewald sums in large systems. *J. Chem. Phys.* **1993**, *98*, 10089–10092.
- (10) Berendsen, H. J. C.; Postma, J. P. M.; van Gunsteren, W. F.; DiNola, A.; Haak, J. R. Molecular dynamics with coupling to an external bath. *J. Chem. Phys.* **1984**, *81*, 3684–3690.
